# Supplementary material for: HPS2-THRIVE randomized placebo-controlled trial in 25 673 high-risk patients of ER niacin/laropiprant: trial design, pre-specified muscle and liver outcomes, and reasons for stopping study treatment
Source: PubMed Central journal article supplement — Eur Heart J. 2013 Feb 26;34(17):1279–91. doi: 10.1093/eurheartj/eht055 (PMC3640201; doi:10.1093/eurheartj/eht055), 2013-02-26
Supplement: supp_eht055_eht055supp.pdf [file supp_eht055_eht055supp.pdf]

# **HPS2-THRIVE: Treatment of HDL to Reduce the Incidence of Vascular Events**

## **Appendix**

### ***Study organisation***

The HPS2-THRIVE study was designed and is being conducted and analysed by the CTSU at Oxford University, which is the independent regulatory sponsor and retains the study database for all analyses (including regulatory submissions). It is an international collaboration with the China Oxford Centre for International Health Research in Beijing, China, and investigators in Denmark, Finland, Norway and Sweden. The study is funded by a grant to Oxford University from Merck (manufacturers of the study drugs) to cover the costs of central coordination and all costs in the UK and China, with direct funding provided by Merck to its subsidiaries in the Scandinavian countries to cover their local study costs. Packaged ERN/LRPT and matching placebo tablets, and simvastatin and ezetimibe/simvastatin tablets, were provided by Merck direct to the local sites. The study Steering Committee includes representatives from the regions, cardiologists, clinical trialists, statisticians and non-voting observers from the funder. An independent Data Monitoring Committee reviewed the data at 6 monthly intervals and was to inform the Steering Committee if, in their view, the randomized comparisons in the study had provided both (a) proof “beyond reasonable doubt” that for all, or some specific types of, patients prolonged use of ER niacin/laropiprant is clearly indicated or clearly contraindicated; and (b) evidence that might reasonably be expected to influence materially the patient management of many clinicians who are already aware of the results of other studies. The Data Monitoring Committee did not make any such recommendation and the study continued to its scheduled end.

### ***Central laboratory assays***

In the UK, the samples were couriered overnight at 4°C to the central laboratory; in the other regions, samples were processed at the local sites and stored at -40°C or below before frozen transfer to the central laboratory in Oxford. Creatinine and lipids (total cholesterol, LDL-C, HDL-C, TG, apoB and apoA1) in lithium heparin plasma, glucose in fluoride oxalate plasma, and creatinine and albumin in

urine were assayed using Beckman-Coulter LX20 and DxC800 clinical chemistry analysers and manufacturers' reagents, calibrators and settings (Beckman-Coulter, UK), except LDL-C and HDL-C which used N-geneous reagents, calibrators and settings (Genzyme Diagnostics, UK). Glomerular filtration rate was estimated using the CKD-EPI formula (1). HbA1c analysis was performed by HPLC using EDTA whole blood on an Arkray HA8160 analyser and reagents with a calibrator supplied by Menarini Diagnostics UK traceable to IFCC and DCCT reference standards. Blood counts were performed using a Coulter Gen-S analyser with manufacturers' reagents, calibrators and settings. All assays were performed in the central laboratory at the CTSU using methods accredited by the UK Accreditation Service, except HbA1c analysis for Chinese samples which were done in Beijing with quality oversight by the CTSU laboratory and Lp(a) measures which were performed at the Northwest Lipid Metabolism And Diabetes Research Laboratories, Seattle, USA.

*Coordinating centre and collaborators*

**Central Coordinating Office, UK Regional Coordinating Centre and China Group (Clinical Trial**

**Service Unit, University of Oxford):** *Administration and support* C Bray, R Dayanandan, E Wincott

(coordinators), P Achiri, C Anderson, T Bahu, S Barry, I Boller, A Brewer, A Brewster, R Brown, A

Burke, E Butler, Y Chen, M Corbett, J Crowther, S Danesh-Pour, R Davis, H Demarest, K Frederick, A

Fortun, T Gordon, M Gray, T Grimsey, N Guy, C Harwood, J Heineman, K Holt, C Hope, S Howard, K

Jayne, M King, S Knight, H Lang, A Lewis, O Machin, Z Madgwick, C Marsden, M Matthewson, S

Michell, J Miller, K Murphy, E Nicholson, J Nie, J Nolan, M Nunn, A Panicker, S Pickworth, Y Qiao, A

Radley, L Rowley, C Sabine, J Sayer, A Taylor, K Taylor, H Thorne, M Wickman, K Yu; *Clinical*

*support and adjudication* J Armitage, T Aung, C Baigent, L Bowman, R Bulbulia, F Chen, Z Chen, R

Clarke, T Dasgupta, S Dunachie, R Haynes, W Herrington, L Hirt, M Landray, D Lewis, W Majoni, C

Murray, K Naessens, K Rahimi, C Reith, E Sammons, M Taylor-Clarke, J Tomson; *Computing*

*coordinators* A Baxter, M Lay, K Wallendszus; *Statistics and computing* R Ait Sadi, K Anderson, I

Barton, C Berry, C Bird, J Booth, M Bowes, Y Bu, R Clack, P Cleverley, G Coates, J Cox, M Craig, J

Crisp, G Cui; P Dalton, C Daniels, A Economou, A Field, S Gilbert, H Gonzalez; R Goodenough, N

Goodwin, P Harding, JC Hopewell, R Thomas-Kurien, S Lambern, G Lancaster, A Maskill, P Morris, Y

Mostefai, S Mulay, A Munday, A Murawska, A Offer, S Parish, N Prajapati, R Reid, S Shams, S Syed, M

Turakani, E Valdes-Marquez, A Young, AC Young, W Zhu; *CTSU Wolfson Laboratory* S Clark, K

Emmens, M Hill, K Kourellias, M Radley, J Wintour (coordinators); M Allworth, A-M Beneat, L Boggs,

T Chavagnon, A Gordon, J Gordon, C Guest, C Hickman, J Hill, R Hrusecka, N Luker, N Plunkett, L

Sansom, R Shellard, J Taylor, P Taylor, J Wheeler, T Williams, M Yeung; *Nurse monitors and trainers* C

Knott (coordinator) S Beebe, K Bowsher-Brown, L Bromhall (deceased), J James, A Lawson, H

Lochhead; **China Regional Coordinating Centre, Beijing:** *Clinical support and adjudication:* F

Feng, Y Gao, J Li, J Liu, X Pang, D Zhang, H Zhang; *Administration and support:* H Dai, F

Feng, J Li, F Liu, L Ma, Y Sun, R Tang, M Xie, X Wei, X Yan, M Yang, H Zhong, L Zhang, S Zhang,

Y Zhang; *Monitors and Trainers:* L Chen, F Feng, Y Gao, W Hundei, J Li, L Li, J Liu, X Yan, A

Zhang, D Zhang, H Zhang; *Laboratory:* L Hou, X Li, Z Liu, Q Song, S Zhang; *Financial:* X Yao, Y

Yao, Y Yu; *IT Support*: H Dai, D Deng, X Wei, L Xu, J Zhang; **Scandinavia Regional**

**Coordination:** *Coordinators* K Arnesson, K Staerkebye; G van Leijenhorst, G Moen; *Monitoring training and support Finland*: A Tiiska; T Vaine; S Roine, S Eronen, L Huponen, T Häikö, H Salonen; *Research Director*: P Koskinen; *Sweden*: L Bergvall; J Levin; I Ek, D Vlaheli, L Hedlöf, C Olsson, T Rasmusson, L Hugo, P Cöster; *Norway*: V Larsen, I E Thorsby, N Eriksen, V Bjorhovde, K Jordheim, I L Östman; *Denmark*: T Johansen, S Mosegaard; H Diget, M Snebjerg, O Moll. **China**

**Collaborators** *Department of Cardiology, The First Hospital of Jilin University, Changchun*: Y Zheng, W Zhao, D Chen, S Zhou, H Sun; *Department of Endocrinology, The First Hospital of Jilin University, Changchun*: Q Liu, X Gang, J Ning, W Guo, L Gao, M Li; *China-Japan Union Hospital of Jinlin University, Changchun*: P Yang, M He, M Ding, Z Feng; *The General Hospital of FAW, Changchun*: H Pan, X Wang, S Zhang, Y Liu, H Liu; *Suzhou Kowloon Hospital*: F Liu, T Zhang, B Shao, J Yu; *The 306th Hospital Of P.L.A., Beijing*: Z Xu, X Li, L Shi, Z Wang, Z Li; *Peking University People's Hospital, Beijing*: N Sun, H Wang, J Wang, F Yang; *Peking University Third Hospital, Beijing*: W Gao, B Chen, X Wang, Z Li, H Wang; *Peking Union Medical College Hospital, Beijing*: S Zhang, J Yan, Z Liu, J Yang, L Li, W Chen, H Bai, S Wang; *Department of Heart Surgery, Fuwai Hospital, Beijing*: Z Zheng, X Wang, X Chen, Y Zhao, X Pan, C Zhang; *Department of Cardiology, Fuwai Hospital, Beijing*: Y Yang, J Song, L Li, D Song; *Beijing Chaoyang Hospital, Capital Medical University*: X Yang, X Lin, F Zhang, M Chen, X Gao, J Li; *Shandong Weifang People's Hospital*: Y Zhang, L Zhao, H Song, H Li; *Department of Cardiology, Tianjin Medical University General Hospital*: Z Wang, Y Sun, W Zhang, Y Li, Y Xu; *Department of Neurology, Tianjin Medical University General Hospital*: Y Cheng, M Zou, J Han, X Tian; *The Second Hospital Of Tianjin Medical University*: X Li, Y Du, W Lu, W Qiu, Y Wang; *Department of Cardiology, Tianjin Union Medicine Centre*: K Liu, S Li, Y Liu, R Wang, C Lyu; *Department of Neurology, Tianjin Union Medicine Centre*: C Zhang, G Chen, C Ma, H Ma, R Zhang; *Department of Cardiology, Tianjin Third Central Hospital*: H Wang, J Luo, S Pi, F Feng; *Department of Neurology, Tianjin Third Central Hospital*: Z Zhang, X Zeng, J Zhang; *Tianjin Fourth Central Hospital*: H Zhang, Y Li, Y Liu, Z Chen; *Tianjin Chest Hospital*: X Guo, J Zhao, S Han, Y Wang; *The General Hospital Of AISCO, Anshan*: W Zhao, X Liu, L Li, L Liu, D Jiao; *Shuangshan Hospital Of Anshan*: R Xiao, R Wu,

X Li, Y Lu; *Tiexi Hospital of Anshan*: B Liu, Z Wang, X Bian, Y Shao; *Department of Cardiology, The People's Hospital Of Liaoning Province, Shenyang*: Z Li, R Cui, Y Liu, D Li, G Dai; *Department of Neurology, The People's Hospital Of Liaoning Province, Shenyang*: X Chen, X Li, Y Wei, Y Lu, Q He, L Zheng; *The Fourth People's Hospital Of Shenyang*: Y Li, X Guan, X Zhou, W Jiang; *Department of Cardiology, The First Hospital Of China Medical University, Shenyang*: G Qi, C Wu, Z Jia, X Li, P Li; *Department of Neurology, The First Hospital Of China Medical University, Shenyang*: C Zhang, Q Li, X Zhang, X Li, C Xu; *Shengjing Hospital of China Medical University, Shenyang*: S Ma, Y Sun, Y Fu, Y Chen, J Shi, H Li, M Zhao, D Zou, Z Zhao; *Department of Cardiology, The First People's Hospital Of Shenyang*: F Feng, J Xu, W Xing, J Wang; *Department of Neurology, The First People's Hospital Of Shenyang*: G Tian, J Zhou, L Li; *The Fourth Affiliated Hospital Of China Medical University, Shenyang*: Y Jin, X Zhou, Y Lin, L Ye; *Liaoning Shenyang Sujiatun District Central Hospital*: H Che, W Feng, D Li, J Guo; *The Fifth People's Hospital Of Shenyang*: Q Diao, Z Liu, H Wang, L Yuan; *Department of Cardiology, Baogang Hospital, Baotou*: Z Ge, L Wei, Q Liu, L Gong; *Department of Neurology, Baogang Hospital, Baotou*: D Wang, H Wang, L Li, J Hou; *The Second Affiliated Hospital of Baotou Medical College*: G Sun, G Wang, G Huang, Y Ding; *The First Affiliated Hospital of Baotou Medical College*: C Wang, J Zhang, D Liu, Q Yang, J Chen; *Inner Mongolia Autonomous Region Hospital, Hohhot*: Y Han, W Lu, Y Zhang, S Dong; *The Affiliated People's Hospital of Inner Mongolia Medical College, Hohhot*: J Liu, L Chen, L Geng; *Department of Cardiology, Tongji Hospital, Tongji Medical College, Wuhan*: D Wang, J Yan, C Xu, C Chen; *Department of Neurology, Tongji Hospital, Tongji Medical College, Wuhan*: W Wang, X Luo, S Xu, D Tian, X Meng; *The First Hospital of Wuhan*: G Chen, L Luo, X Pan, X Rao; *Department of Cardiology, Wuhan Puai Hospital*: Y Gu, L Li, Z Cheng, X Liu; *Department of Neurology, Wuhan Puai Hospital*: J Wang, X Zeng, Z Luo, Q Yan; *Central Hospital of Wuhan*: S Zhao, L Chen, J Chen, L Guo, N Li, A Fu; *Wuhan Asia Heart Hospital*: X Su, S Zhao, X Zhai, W Wu, J Zheng; *Department of Cardiology, The First Affiliated Hospital of Zhengzhou University*: Z Huang, X Fu, H Yao, X Zhang; *Department of Neurology, The First Affiliated Hospital of Zhengzhou University*: B Zhang, Y Liu, Z Fu, X Ma, H Wei; *Department of Cardiology, The Second Affiliated Hospital of Zhengzhou University*: Y Zhao, Q Zhang, J Dong, H Li; *Department of Neurology, The*

*Second Affiliated Hospital of Zhengzhou University: J Lou, X Yang, C Cui, J Su, X Zhang; The Central Hospital of Zhengzhou: L Zhang, H Sun, H Li, R Wang; Department of Cardiology, The Affiliated Hospital of Xuzhou Medical College: D Li, T Xu, W Wu, H Zhu, X Ma; Department of Neurology, The Affiliated Hospital of Xuzhou Medical College: X Shen, Z Zhang, J Lu; Department of Cardiology, Xuzhou Central Hospital: Q Fu, A Zhao, L Wang, J Li; Department of Neurology, The Central Hospital of Xuzhou: Z Yu, X Zhang, C Yang, Y Ling; Department of Cardiology, Xuzhou No 1 People's Hospital: H Zhang, L Li, Y Shang, M Hu; Department of Neurology, Xuzhou No.1 People's Hospital: L Zhou, D Kong, N Wang, H Shang; Department of Cardiology, The General Hospital Of Xuzhou Mining Group: W Wu, J Feng, L Li, X Yang; Department of Neurology, The General Hospital Of Xuzhou Mining Group: L Rong, X Wei, A Gong, J Dong; The Third Peoples Hospital of Xuzhou: L Wang, X Tang, C Zong, C Zhao; Department of Emergency, The Affiliated Hospital of Medical College Qingdao University: C Zhou, Y Wang, M Guo, X Yang; Department of Neurology, The Affiliated Hospital of Medical College Qingdao University: H Pei, H Li, D Han; Department of Emergency, Qingdao Municipal Hospital: F Zhang, D Hou, Q Zhang, Y Li, Z Sun, L Wang; Department of Cardiology, Qingdao Municipal Hospital: X Wang, Y Wang, Y Yao; Chinese Academy of Medical Science, Qingdao Fuwai: Y Yang, G Wu, Y Chang, J Mao; Department of Cardiology, The First Clinical College of Harbin Medical University: W Li, X Zhang, B Liu, M He, J Jing, J Feng, Y Zhang, Y Bao; Department of Neurology, The First Clinical College of Harbin Medical University: L Zhang, Y Sun, B Liu, S Zhou, X Wang, Y Zhang; Department of Cardiology, The Second Affiliated Hospital of Harbin Medical University: B Yu, Y Luan, W Cao, Y Wang, L Diao; Department of Neurology, The Second Hospital of Harbin Medical University: W Wang, D Yang, Y Zhu, L Liu, X Meng; **UK Collaborators** Aberdeen Royal: J Webster, H Clark, J Henderson, V Herd, P McDonald; Addenbrooke's, Cambridge: M Brown, F Mir, S Blackwood, S Hood, G Carr; Barnsley: B Saeed, W Khan, M Tahir, K Elliott, M Reid; Bedford: I Cooper, A Gallivan; Birmingham City: A Basu, B Gammon, S Poxon; Birmingham Heartlands: A Jones, L Andrews, E Burke, M Drew, C Jewkes; Blackpool Victoria Hospital: D Roberts, L Hutt, S Pickervance, L Radford, M Jones; Bradford Royal: S Lindsay, C Atkinson, K Rees, A Wilson, P Brown; Bristol Royal: G Bayly, J Chambers; Cheltenham General: R Bulbulia, K Poskitt, P Hilltout, S Smith, J Rawlings; Colwyn Bay:*

C Bellamy, E Horner; *Conquest Hastings*: R Wray, H McIntyre, H Pepper, J Sinclair; *Worcestershire Royal Hospital, Worcester and Corbett Medical Practice, Droitwich Spa*: A Munro, J Trevelyan, V Wilkie, J Colley, A Doughty; *Cumberland*: H Robson, K Willmer, T Joseph, P Davies, M Cowley, A Graham, C Hagon, R Jolly, N Kelsall, U Poultney, E Warwick; *Darlington Memorial*: J Murphy, G Brennan, S Stubbing, M Boon; *Derriford*: J Fulton, C Davison, J Simmonds, R Squire, C West, S Pedlar; *Dewsbury*: H Chidambara, G Bateman, M Khalifa; *Dorset County*: T Edwards, B Anderson, S Breakspear, L O'Shea, P Jeffreys; *Eastbourne*: G Lloyd, N Patel, H Bailey, S Carter, J Large; *Edinburgh Royal*: D Newby, H Cuthbert, L Flint, H Nailon, J Robertson; *Frenchay, Bristol*: M Papouchado, G Andrews, N Manning; *Glenfield, Leicester*: I Hudson, P DeSouza, S Mellor, K Henson; *Guy's and St Thomas*: J Chambers, A Wierzbicki, D Grant, D Parkin; *Harrogate*: P Hammond, C Bennett, A Wray; *Hillingdon*: R Hillson, M Edwards, N Mahabir, Y MacDonald; *Hospital of St Cross, Rugby*: P O'Hare, B De Burca, J Jones, J Wykes; *Huddersfield Royal*: H Griffiths, A Burrows, D Appleyard, A Wilson, M Habron, A Kudarenko; *King's Mill, Sutton-in-Ashfield*: R Lloyd-Mostyn, I Idris, P Bushby, S Dale, S Hardingham, S Thomas, V Godfrey; *Leighton, Crewe*: S Mallya, A Heald, J Maiden, J Rhodes, S Tapscott, K Dillon; *Lister, Stevenage*: M Lynch, A Viljoen, W Burog, M Dhaliwal; *Luton and Dunstable*: C Travill, S Gent, R Hering, A Wilkinson, D Shah; *Macclesfield*: R Egdell, E Rickards, A Taylor Bennett; *Manor, Walsall*: P Giles, A Hartland, A Isaew, E Walton, K Parry, L Hawkins; *Morriston, Swansea*: P Thomas, C Weston, C Fagan, E Hopkins, C Jones, S Davies, T Ghuman; *Musgrove Park, Taunton*: R Andrews, N Salter; *Neath Port Talbot*: C Jones, A Owen, P Thomas, S Meredith, C Thomas, E Alford; *Ninewells, Dundee*: T Pringle (deceased), S Pringle, H Waldie, S Hutcheon, G McNeill, K Smith; *Norfolk and Norwich University Hospital*: E Roberts, A Ryding, I Gallagher, T Harris, M Ilsley; *North Manchester General*: J Swan, D McSorland, C O'Neill; *North Tyneside General*: R Curless, C Doig, P McKenna, M Armstrong; *Northampton General*: J O'Donnell, P Davey, G Nayani, L James, K Smith, E Tanqueray, C Hemmington, P Mackenzie, S Russell; *Northwick Park*: R Senior, J Evans, A Sinton, B Sparkes; *Peterborough City*: D Rowlands, J Porter, T Ahmed, S Hamill, S James, M Mortimer, T Peachey; *Pinderfields, Wakefield*: C White, H Chidambara, G Bateman, M Khalifa, J Massarella; *Poole*: A McLeod, B Howarth, F Keene, K Knops, P Jeffery; *Princess Royal, Telford*: N Capps, D Donaldson,

L Tonks; *Queen Elizabeth, Birmingham*: J Townend, C Aston, E Dwenger, T Mistry, C Crook; *Queen's Hospital, Burton-upon-Trent*: T Reynolds, M Jones, J Reynolds, K Pennlington; *Queen's Medical Centre, Nottingham*: P Mansell, T Gazis, B Mendis, A Selby, K Ward, J Wallis; *Richard Doll Building, Oxford*: J Armitage, M Landray, H Watkins, A Alexander, S Beebe, L Bromhall (deceased), K Bowsher-Brown, H Cowan, A Isaew, J James, A Lawson, H Lochhead, V Toghill, L Wright, D Jackson, A Taylor; *Rotherham General*: R Muthusamy, A Jahangir, C Weston, V Darlow; *Royal Berkshire*: W Orr, J Foxton, J King; *Royal Blackburn*: S Ramtoola, J McDonald, Y Grimes, K Rutherford, F Ibrahim; *Royal Bolton*: A Hutchesson, K Morris; *Royal Bournemouth*: A Rozkovec, S Orr, P Ryder, C Thomas, J Walker, A Sinclair-Brackstone; *Royal Cornwall*: S Fleming, M Parrett, L Quinn, B Howes, P Ivanovic, A James, R Soper; *Royal Derby*: G Tan, F Game, A Boyal, T Gibson, J Maiden, V Mountford, J Reynolds, S Yates; *Royal Devon and Exeter*: K MacLeod (deceased), M James, S Estcourt, E Green, S Henson; *Royal Hallamshire, Sheffield*: T Gray, S Song, K Birchall, A Creaser-Smith, E Goodwin, C Morgan, A Nazir, M Stringer, J Tandy, C Dakin, J Williamson, H Dunn, L Strong, S Roney, T Standering; *Royal Surrey County*: T Chua, C Livingstone, C Blythe, M Payne, A Selby; *Royal Sussex County*: D Hildick-Smith, E Joyce, N Skipper, G Bassett; *Royal United, Bath*: J Reckless, G Andrews, J Howard, C Shute, S Pope; *Royal Victoria, Belfast*: P Nicholls, I Young, N Brown, S Loughridge, M Blaney, L Bradford; *Royal Victoria, Newcastle*: I U Haq, C Albers; *Russells Hall*: M Labib, M Allen, L Higginson, A Zhao, C Ford, L Wright; *St Helens, Liverpool*: J Ball, K Hardy, L McCulloch, M Sheridan, A Wilson, D Mair; *St Helier*: J Barron, H Wilcox, M Lapsley, B Bradford, M McIntosh; *St Marys, Portsmouth*: P Kalra, A Siva, D Barnes, S Golledge, K Hudson, A Suttling, M Ambler; *St Richard's, Chichester*: Y Wong, C Murphy, C Reid, S Moore, S Stearn; *Salford Royal*: A Fitchet, P Kingston, K Morris; *Sandwell General*: E Hughes, B Gammon, S Poxon, C Verow, N McCarthy, R Kumar; *Scunthorpe General*: J John, S Chattopadhyay, D Briggs, C Gray, D Bruce; *Southampton General*: C Shearman, C Sibley, E Hayward, D Tyler; *Stafford* : K Evans, J Bellaby, C Wood; *Stepping Hill, Stockport*: P Lewis, A Brown, H Cochrane, J Curtis, S Scanlon; *Sunderland Royal*: S Junejo, M Farrer, L Cowell; *Torbay*: C Carey, J Sutton; *University Hospital, Coventry*: M Been, B De Burca, J Jones, J Wykes; *University Hospital of North Staffordshire*: J Creamer, K Castro, J Machin, E Sellars; *University Hospital of Wales*: I McDowell, P



Groves, L Davies, H Dyer, C Dennison; *Victoria Hospital, Kirkcaldy*: M Francis, V Bryson; *Walton Centre*: R White, P Enevoldson, A Amadi, K O'Hanlon, S Saminaden, L Wyatt, A Atkins; *Watford General*: M Clements, F Lukwago, K Markwell, E Walker, E Atkins; *West Cumberland, Whitehaven*: K Willmer, O Orugun, D Koziara R Jolly, U Poultney; *Whipps Cross University Hospital*: F Lie, J Hogan, V Conteh, M Montemayor, N Mooneyan, V Ramasamy, H Sizeni, D Hart; *Worthing*: M Signy, R Chilton, R Gomez Marcos, G Peters; *Wycombe*: S Price, N Mahabir; *Wythenshawe*: S Ray, D Daniel, J Dean-Oshodi; *Yeovil District*: G Brigden, G Chung, C Buckley, C Vickers. **Scandinavian Collaborators: Denmark** *National coordinator*: K Egstrup *Collaborators*: *Sygehus Fyn, Svendborg*: K Egstrup, T Sønder, A Osmanagic, T Brøcher Christophersen, T Erstad, D E Høfsten, M Løgstrup, K Vinther, M Lundegaard, A Due, M Hansen; *Regionshospitalet, Randers*: J Bertelsen, H Rickers, T Jensen, B Winter Friis, M Morsing, M Rasmussen; *Sydvestjysk Sygehus, Esbjerg*: K Thomsen, J Hummelshøj, A Nygaard, L Knudsen, T Nielsen, L Tanggaard; *Roskilde Sygehus, Roskilde*: G Jensen, T Melchior, S Heinsvig, I Larsen, V Perrit-Gentil; *Hvidovre Hospital, Hvidovre*: S Rasmussen, N Skov, K Meier; *Glostrup Amtssygehus, Glostrup*: J Nielsen, J Abdulla, J Berning, J Jensen, J Jeppesen, M Seibæk, A-L Jorgensen, M Bulow; *Gentofte Amtssygehus*: Hellerup: N E Bruun, C Larsen, R Vedby-Rasmussen, L Fahlström, K Ladegaard- Rasmussen, H Bjørnager, A Holdgaard; *Kolding Sygehus, Kolding*: A Dorph Petersen, O Nyvad, J Meinertz Byg, P Wiggers, L Schmidt-Thomsen, L Holm-Pedersen, B Felthaus, J Mørkeberg; *Regionshospitalet, Viborg*: I C Klausen, E Steen-Nielsen, B Hedegaard, E-M Dalbjerg; *Holbæk Sygehus, Holbæk*: N Roseva-Nielsen, D Hansen, H Madsen, K Kristensen, H Ibsen, K Schultz, B Fredenhardt, J I Nielsen, L Petersen, T Bang-Hansen, L Jensen, C Justesen, M Storm Larsen, T Veng-Olsen; *Herning Sygehus, Herning*: J U Brorholt-Petersen, M Andersen, V Lynggaard, S Vester, S Hansen, B Larsen, L Madsen; *Herlev Sygehus, Herlev*: K Skagen, U Schmidt, T Poulsen, H Christensen, J Hansen, J M Appel, A Therkelsen; *Gentofte Hospital 2, Hellerup*: C Pedersen, S Andersen, D-M Bretler, T Schram, J Madsen, G Von Jessen, M Nielsen, K Serup-Hansen; *Rigshospitalet, Copenhagen*: P Clemmensen, P Grande, B Thomsen, K Graversen, L Hedegaard, H Mirchandani; *Helsingør Sygehus, Helsingør*: N Ralfkiaer, P Lunn, S Nielsen, H Gottschalck; *Haderslev Sygehus, Haderslev*: L Lemming, F Davidsen, M Hansen, C Markussen; *Aalborg Sygehus, Aalborg*: E B Schmidt, H Vadmann, T Andersen, T

Madsen, M Rene Nielsen, J Stegger, M Storgaard, L Kobbelgaard, G Mikkelsen, A Andreasen, *Kolding Sygehus, Kolding*: J Jepsen, J Gesla, L Holm-Perdersen, B Kaspersen, B Eskesen, M Loekke; *Kollesterollaboratoriet, Gentofte*: S Stender, M Andersen, H Jonsson, T Brink-Kjær, M Bülow, A-L Jørgensen, N Petersen, A M Raabyemagle, L Koch; *Slagelse Sygehus, Slagelse*: J Lomholdt, M Lessing, K Niemann, H Møllerup; *Næstved Sygehus, Næstved*: J Thorsen, P Elin, B Jensen. **Finland**  
*National coordinator*: A Kesaniemi *Collaborators*: *Oulun yliopistollinen sairaala, Oulu*: A Kesaniemi, O Ukkola, E Eloranta, L Ukkola, P Ojala, L Mannermaa; *Helsingin yliopisto, Helsinki*: J Tuomilehto, C Sarti, P Sintonen, R Lehtisalo, M Mähönen, E Lahdensuo; *Vantaa Tutkimuskeskus, Vantaa*: K Humaloja, M Minkkinen, U Nopola-Humaloja, K Jarvinen, K Azejian, J Vaerma; *Kuopion liikuntalaaketieteen tutkimuslaitos, Kuopio*: T Lakka, G Smirnov, H Tuomilehto, N Musakka, M Merikoski; *Tampereen tutkimuskeskus, Tampere*: A Hiukka, A Putila, J Hietala; *Mediwest Seinäjoki, Seinäjoki*: T Haapaniemi, S Pihlaja, L Viro, S Viisteensaari; *CorusFit Oy, Jyväskylä*: M Perhonen, M Valtonen, M Varakas, M Moilanen, A Kivisari, M Kuparinen; *Kuusankosken terveysasema, Kuusankoski*: ML Tuominen, A Haaraaja; *Etelä-Karjalan keskussairaala, Lappeenranta*: E Hussi, S Valpas, A Keskitalo; *Kansanterveystieteenlaitos, Helsinki*: J Tuomilehto, C Sarti, R Lehtisalo, M Mähönen, P Sintonen, E Lahdensuo; **Norway** *National coordinator*: D Atar *Collaborators*: *Oslo universitetssykehus, Oslo*: D Atar, P Vanberg, K Jahnsen, S Kjellesvik; *Ulleval universitetssykehus, Oslo*: T Pedersen, T O Klemsdal, R Kleve, L Flakk; *Ostlandske Hjertesenter, Moss*: P-A Sirnes, V Nilsen, A-K Hammersmark; *Skedsmo Medisinske Senter, Skedsmokorset*: K Risberg, H Hansen, M Berg, G Ronaas; *Medi3 Innlandet, Hamar*: H-O Hoivik, B Furuseth, S Nystuen, S Paulsen Sundeng; *Sykehuset Innlandet, Hamar*: K Andersen, H Kydland, E Sjøby, T Larsen, H Slettmoen, E K Væringstad; *Sykehuset Innlandet, Lillehammer*: M Grundtvig, L E Erdal, G Szacinski, M German; *Legegruppen Grandgarden, Arendal*: B Bratland, M-B Hornnes, G Sporaland, F Johnsen, O Starheim, G Mouland, J Vikingsdal, A L Torgersen; *Stavanger Helseforskning, Stavanger*: P Munk, T Jonassen, J Cooper, N Butt, T Aarsland, J M Nilsen, A G Larsen, S Moen; *Haugesund Hjerterpraksis, Haugesund*: R Rød, R M Stodle; *Haukeland universitetssykehus, Bergen*: C Berge, O Nygaard, N Tuseth, G Svingen, H Schartum-Hansen, J E Nordrehaug, I A Oppedal, B Gjellefall, S Thorsen, J Dyngeland; *Fana Hjertesenter, Nesttun*: P K Ronnevik, T Ronnevik, A Bråten; *Spesialistsenteret,*

*Straume*: B K Oie, A-M Thunestveit; *Trondheim Hjertesenter, Trondheim*: G Skjelvan, S Strand;  
*Hjerteklinikken, Harstad*: K A Hofsoy, A L Reiss, E Bruun; *Helse sunnmøre, Ålesund*: J Å  
Vegsundsvåg, E Holte, M Skjold, H Nes; *Sykehuset Innlandet, Kongsvinger*: J Sparby, E Werenskiold,  
A Faret.; *Heimdal Helsehus Legesenter, Heimdal*: I M Jørum, B Korssjøen, O Gaupen, L Løvaas, R  
Myran, P Schrøder, A-S Jørum, H Berdal, B Myklebust; *Sinsenklubben, Oslo*: O Karstad, L  
Hektoen, M Andresen, J Kristensen, E Karstad; *Helse Førde, Førde*: T Vingsnes, Å Johnsen, A  
Bjørkås, I Vassbotten; *Lund legesenter, Kristiansand*: S Ø Thomassen, S Bø, L Hæstad, C  
Ingebretsen, M Marcussen; **Sweden National coordinator**: L Jonasson *Collaborators*:  
*Universitetssjukhuset, Linköping*: L Jonasson, B Hedbäck, M Börjesson, A Raschperger, M Hedbäck;  
*Höglandssjukhuset, Eksjö*: P Cherfan, M Norman, Y Pantzar; *Centrallasarettet, Växjö*: P Vasko, M  
Yngvesson, S Johansson, I Uggeldahl, M Sjöo-Boqvist; *Närvårdskliniken, Finspång*: A-M  
Frödenberg, A Rudenäs, A-L Neumann; *Rättviks Hälsan, Rättvik*: H Larnefeldt, M Björkman-  
Larnefeldt, V-A Lindvall; *Ljungby lasarett, Ljungby*: A Andersson, K-A Svensson, C Johnsson, C  
Nilsson, M Millborg, A-M Ohlin, A Solberg; *Central Sjukhuset, Kristianstad*: I Lager, I Torstensson,  
A Knutsson, K Hårsmar; *Capio Citykliniken, Lund*: C-J Lindholm, J Thulin, E Assarsson, M Broberg,  
H Tregge; *Göingenkliniken, Hässleholm*: G Stehn, C Lindgren, M Åkerberg, M Ulfvik; *Alingsås  
lasarett, Alingsås*: H Nordström, J Sörbo, L Back, V Carter; *Hjärthuset AB, Varberg*: T Carlsson, C  
Nemeczek, A Nemeczek, A Sterner-Bengtsson; *Två medicinare, Järfälla*: P-Å Lagerbäck, B-O  
Tengmark, B Bjurman, L Eng-Sjöberg; *Capio City Klinik 2, Lund*: C-J Lindholm, U-B Ericsson, J  
Thulin, K Hansson, E Assarsson, M Broberg; *Lindesbergs lasarett, Lindesberg*: A-S Eriksson, A  
Stenberg, T Fraser, D Ticic, A Gunnarsson, H Lindrooth, K Molander; *PRIM site, Örebro*: E  
Ackefelt-Frick, M Berglund, R Ellervik-Forest, P Fardelin, F Freire, E Norgren-Holst, K Eriksson, U  
Larsson, H Samuelsson, L Garö, J Kjellberg-Eriksson, A Eklöf, E Carlsson, L Irvhage, P Jaensson, E  
Melander, I Nordin-Olsson, B Strandell, H Udd, A Krantz; *Universitets Sjukhuset, Malmö*: A  
Gottsäter, A Alhadad, M Eriksson, B Palmqvist; *Bergslags sjukhuset, Fagersta*: E Hammarström, P  
Nicol, S Holmström, I-B Svennberg, I Ojakangas, I Andersson; *Danderyds Sjukhus, Danderyd*: K  
Knudsen-Malmqvist, N Östlund-Papadogeorgos, H Tjerneld, M Nilsson, C Andersson, M Asperen;  
*City Heart, Stockholm*: C Höglund, L Hjelmæus, R Zlatewa, I McLain, E Lindemann, B Rangman;

*Skellefteå lasarett, Skellefteå*: J-H Jansson, B Norrfors, L-M Lundmark, M Olofsson; *City Site, Stockholm*: B-O Tengmark, S Gunvarsdotter, C Andersson, M Dewerand; *Silentzvägens Vårdcentral, Uddevalla*: G Dahlen, B Polhem, K Johansson; *Ladulaas Kliniska Studier, Skene*: K Berndtsson-Blom, R Andersson, K Davidsson, I Wiklund; *me3plus Clinical Trials, Göteborg*: C-P Anderberg, D Curia, F Enqvist, D Norberg, E Dahl, H Åkesson; *Bollnäs hälsocentral, Bollnäs*: U Sundström, H Frostebro, M Broman; *Hässleholms Sjukhus, Hässleholm*: I Timberg, M Stjernberg, P Wikström; *Blekinge Sjukhuset, Karlshamn*: S Jensen, M Främby, A Glaas, C Olsson; *Oskarshamns Sjukhus, Oskarshamn*: U Mathiesen, K Fehling, U Robertsson; *Stockholm Heart Center, Stockholm*: A G Olsson, P Löf, S Gunvarsdotter, L Bastani. **Merck clinical liaison** D Kush, J Anderson, J Fable. **Northwest Lipid Metabolism And Diabetes Research Laboratory, Seattle, USA** S Marcovina, H Gong

## References

1. Levey AS, Stevens LA, Schmid CH, Zhang YL, Castro AF, 3rd, Feldman HI, Kusek JW, Eggers P, Van Lente F, Greene T, Coresh J. A new equation to estimate glomerular filtration rate. *Ann Intern Med.* 2009;150:604-12.
