# Supplementary material for: HPS2-THRIVE randomized placebo-controlled trial in 25 673 high-risk patients of ER niacin/laropiprant: trial design, pre-specified muscle and liver outcomes, and reasons for stopping study treatment
Source: PubMed Central journal article supplement — Eur Heart J. 2013 Feb 26;34(17):1279–91. doi: 10.1093/eurheartj/eht055 (PMC3640201; doi:10.1093/eurheartj/eht055), 2013-02-26
Supplement: supp_eht055_eht055supp_tables.pdf [file supp_eht055_eht055supp_tables.pdf]

**Supplementary Table 1: Expanded baseline characteristics of randomized participants**

|                                       | China        | Europe        | All           |
|---------------------------------------|--------------|---------------|---------------|
| <b>Number randomized</b>              | 10932        | 14741         | 25673         |
| <b>Age (years)</b>                    |              |               |               |
| Mean (SD)                             | 63.4 (7.6)   | 65.9 (7.2)    | 64.9 (7.5)    |
| <65                                   | 6216 (56.9%) | 6716 (45.6%)  | 12932 (50.4%) |
| ≥65 <70                               | 2160 (19.8%) | 3464 (23.5%)  | 5624 (21.9%)  |
| ≥70                                   | 2556 (23.4%) | 4561 (30.9%)  | 7117 (27.7%)  |
| <b>Sex</b>                            |              |               |               |
| Male                                  | 8680 (79.4%) | 12549 (85.1%) | 21229 (82.7%) |
| Female                                | 2252 (20.6%) | 2192 (14.9%)  | 4444 (17.3%)  |
| <b>History</b>                        |              |               |               |
| <b>Coronary disease</b>               |              |               |               |
| Myocardial infarction                 | 6999 (64.0%) | 10346 (70.2%) | 17345 (67.6%) |
| Angina                                | 3950 (36.1%) | 3967 (26.9%)  | 7917 (30.8%)  |
| Coronary revascularization            | 5411 (49.5%) | 8517 (57.8%)  | 13928 (54.3%) |
| Any coronary disease                  | 8407 (76.9%) | 11730 (79.6%) | 20137 (78.4%) |
| <b>Cerebrovascular disease</b>        |              |               |               |
| Presumed ischaemic stroke             | 4207 (38.5%) | 2364 (16.0%)  | 6571 (25.6%)  |
| Haemorrhagic stroke                   | 189 (1.7%)   | 153 (1.0%)    | 342 (1.3%)    |
| Transient ischaemic attack            | 342 (3.1%)   | 1458 (9.9%)   | 1800 (7.0%)   |
| Cerebral revascularization            | 41 (0.4%)    | 545 (3.7%)    | 586 (2.3%)    |
| Any cerebrovascular disease           | 4462 (40.8%) | 3708 (25.2%)  | 8170 (31.8%)  |
| <b>Peripheral arterial disease</b>    |              |               |               |
| Intermittent claudication             | 464 (4.2%)   | 2216 (15.0%)  | 2680 (10.4%)  |
| Peripheral revascularization          | 85 (0.8%)    | 1465 (9.9%)   | 1550 (6.0%)   |
| Any peripheral arterial disease       | 508 (4.6%)   | 2706 (18.4%)  | 3214 (12.5%)  |
| <b>Glycaemic status<sup>a</sup></b>   |              |               |               |
| Abnormal glucose tolerance            | 1152 (10.5%) | 1010 (6.9%)   | 2162 (8.4%)   |
| Diabetes mellitus                     | 4611 (42.2%) | 3688 (25.0%)  | 8299 (32.3%)  |
| <b>Metabolic syndrome<sup>b</sup></b> | 4149 (38.0%) | 5167 (35.1%)  | 9316 (36.3%)  |
| <b>Treated hypertension</b>           | 6894 (63.1%) | 9025 (61.2%)  | 15919 (62.0%) |
| <b>Heart Failure<sup>c</sup></b>      |              |               |               |
| NYHA 1-2                              | 434 (4.0%)   | 931 (6.3%)    | 1365 (5.3%)   |
| NYHA 3-4                              | 38 (0.3%)    | 28 (0.2%)     | 66 (0.3%)     |
| <b>Smoking status</b>                 |              |               |               |
| Never                                 | 4197 (38.4%) | 4529 (30.7%)  | 8726 (34.0%)  |
| Former                                | 4248 (38.9%) | 8089 (54.9%)  | 12337 (48.1%) |
| Current                               | 2487 (22.7%) | 2123 (14.4%)  | 4610 (18.0%)  |
| <b>Alcohol intake (units/week)</b>    |              |               |               |
| None                                  | 9516 (87.0%) | 5669 (38.5%)  | 15185 (59.1%) |
| >0 <21                                | 1243 (11.4%) | 7780 (52.8%)  | 9023 (35.1%)  |
| ≥21                                   | 173 (1.6%)   | 1292 (8.8%)   | 1465 (5.7%)   |

<sup>a</sup> Abnormal glucose tolerance: Not diabetic and baseline plasma glucose ≥7.8 mmol/l if fasted <8 hours or ≥6.0 mmol/l if fasted ≥8 hours); Diabetes (self-reported, or baseline plasma glucose ≥11.1 mmol/l if fasted <8 hours or ≥7.0 mmol/l if fasted ≥8 hours, or baseline HbA1c ≥48 mmol/mol, or use of hypoglycaemic medication at randomization)

<sup>b</sup> As defined by ATP III

<sup>c</sup> New York Heart Association grade (NYHA) grade

<sup>d</sup> Waist circumference: Normal (men <94, women <80); Increased (men ≥94 <102, women ≥80 <88); Excessive (men ≥102, women ≥88)

<sup>e</sup> Angiotensin converting enzyme inhibitor (ACEi) or angiotensin-2 receptor blocker (ARB)

**Supplementary Table 1: Expanded baseline characteristics of randomized participants**

|                                       | China        | Europe        | All           |
|---------------------------------------|--------------|---------------|---------------|
| <b>Physical measurements</b>          |              |               |               |
| Systolic blood pressure (mmHg)        |              |               |               |
| <140                                  | 5109 (46.7%) | 6342 (43.0%)  | 11451 (44.6%) |
| ≥140 <160                             | 3447 (31.5%) | 5244 (35.6%)  | 8691 (33.9%)  |
| ≥160                                  | 2376 (21.7%) | 3155 (21.4%)  | 5531 (21.5%)  |
| Diastolic blood pressure (mmHg)       |              |               |               |
| <90                                   | 8599 (78.7%) | 11546 (78.3%) | 20145 (78.5%) |
| ≥90 <100                              | 1651 (15.1%) | 2522 (17.1%)  | 4173 (16.3%)  |
| ≥100                                  | 682 (6.2%)   | 673 (4.6%)    | 1355 (5.3%)   |
| Body mass index (kg/m <sup>2</sup> )  |              |               |               |
| <25                                   | 3901 (35.7%) | 2701 (18.3%)  | 6602 (25.7%)  |
| ≥25 <30                               | 5865 (53.6%) | 6995 (47.5%)  | 12860 (50.1%) |
| ≥30                                   | 1166 (10.7%) | 5045 (34.2%)  | 6211 (24.2%)  |
| Waist circumference (cm) <sup>d</sup> |              |               |               |
| Normal                                | 4888 (44.7%) | 2855 (19.4%)  | 7743 (30.2%)  |
| Increased                             | 3368 (30.8%) | 3958 (26.9%)  | 7326 (28.5%)  |
| Excessive                             | 2676 (24.5%) | 7928 (53.8%)  | 10604 (41.3%) |
| <b>Medications</b>                    |              |               |               |
| Current statin use (years)            |              |               |               |
| None                                  | 5625 (51.5%) | 566 (3.8%)    | 6191 (24.1%)  |
| >0 <3                                 | 4339 (39.7%) | 3811 (25.9%)  | 8150 (31.7%)  |
| ≥3 <6                                 | 750 (6.9%)   | 4584 (31.1%)  | 5334 (20.8%)  |
| ≥6                                    | 218 (2.0%)   | 5780 (39.2%)  | 5998 (23.4%)  |
| Study LDL-lowering therapy (daily)    |              |               |               |
| Simvastatin 40 mg                     | 8051 (73.6%) | 5491 (37.2%)  | 13542 (52.7%) |
| Ezetimibe/simvastatin 10/40 mg        | 2881 (26.4%) | 9250 (62.8%)  | 12131 (47.3%) |
| Non-study medications                 |              |               |               |
| Aspirin                               | 9417 (86.1%) | 12742 (86.4%) | 22159 (86.3%) |
| Other antiplatelet                    | 1910 (17.5%) | 2727 (18.5%)  | 4637 (18.1%)  |
| ACEi or ARB <sup>e</sup>              | 4657 (42.6%) | 10090 (68.4%) | 14747 (57.4%) |
| Diuretic                              | 969 (8.9%)   | 3750 (25.4%)  | 4719 (18.4%)  |
| Calcium channel blocker               | 3454 (31.6%) | 3638 (24.7%)  | 7092 (27.6%)  |
| Beta blocker                          | 5635 (51.5%) | 9495 (64.4%)  | 15130 (58.9%) |

<sup>a</sup> Abnormal glucose tolerance: Not diabetic and baseline plasma glucose ≥7.8 mmol/l if fasted <8 hours or ≥6.0 mmol/l if fasted ≥8 hours; Diabetes (self-reported, or baseline plasma glucose ≥11.1 mmol/l if fasted <8 hours or ≥7.0 mmol/l if fasted ≥8 hours, or baseline HbA1c ≥48 mmol/mol, or use of hypoglycaemic medication at randomization)

<sup>b</sup> As defined by ATP III

<sup>c</sup> New York Heart Association grade (NYHA) grade

<sup>d</sup> Waist circumference: Normal (men <94, women <80); Increased (men ≥94 <102, women ≥80 <88); Excessive (men ≥102, women ≥88)

<sup>e</sup> Angiotensin converting enzyme inhibitor (ACEi) or angiotensin-2 receptor blocker (ARB)

**Supplementary Table 2: Baseline lipids and other biochemical characteristics of randomized participants**

|                                                | China        | Europe        | All           |
|------------------------------------------------|--------------|---------------|---------------|
| <b>Number randomized</b>                       | 10932        | 14741         | 25673         |
| <b>Baseline lipids<sup>a</sup></b>             |              |               |               |
| Total Cholesterol (mmol/l)                     |              |               |               |
| Mean (SD)                                      | 3.14 (0.54)  | 3.45 (0.55)   | 3.32 (0.57)   |
| <3.0                                           | 4308 (39.4%) | 2821 (19.1%)  | 7129 (27.8%)  |
| ≥3.0 <3.5                                      | 4044 (37.0%) | 5447 (37.0%)  | 9491 (37.0%)  |
| ≥3.5                                           | 2580 (23.6%) | 6473 (43.9%)  | 9053 (35.3%)  |
| LDL-C (mmol/l)                                 |              |               |               |
| Mean (SD)                                      | 1.51 (0.41)  | 1.74 (0.43)   | 1.64 (0.44)   |
| <1.5                                           | 5579 (51.0%) | 4281 (29.0%)  | 9860 (38.4%)  |
| ≥1.5 <2.0                                      | 4278 (39.1%) | 6776 (46.0%)  | 11054 (43.1%) |
| ≥2.0                                           | 1075 (9.8%)  | 3684 (25.0%)  | 4759 (18.5%)  |
| ApoB (g/l)                                     |              |               |               |
| Mean (SD)                                      | 0.65 (0.13)  | 0.70 (0.14)   | 0.68 (0.14)   |
| <0.6                                           | 4116 (37.7%) | 3174 (21.5%)  | 7290 (28.4%)  |
| ≥0.6 <0.7                                      | 3330 (30.5%) | 4961 (33.7%)  | 8291 (32.3%)  |
| ≥0.7                                           | 3486 (31.9%) | 6606 (44.8%)  | 10092 (39.3%) |
| HDL-C (mmol/l)                                 |              |               |               |
| Mean (SD)                                      | 1.06 (0.24)  | 1.19 (0.31)   | 1.14 (0.29)   |
| <0.9                                           | 2616 (23.9%) | 2284 (15.5%)  | 4900 (19.1%)  |
| ≥0.9 <1.1                                      | 4056 (37.1%) | 4079 (27.7%)  | 8135 (31.7%)  |
| ≥1.1                                           | 4260 (39.0%) | 8378 (56.8%)  | 12638 (49.2%) |
| ApoA1 (g/l)                                    |              |               |               |
| Mean (SD)                                      | 1.38 (0.21)  | 1.51 (0.24)   | 1.45 (0.24)   |
| <1.4                                           | 6340 (58.0%) | 4896 (33.2%)  | 11236 (43.8%) |
| ≥1.4 <1.6                                      | 3102 (28.4%) | 5311 (36.0%)  | 8413 (32.8%)  |
| ≥1.6                                           | 1490 (13.6%) | 4534 (30.8%)  | 6024 (23.5%)  |
| Triglycerides (mmol/l)                         |              |               |               |
| Mean (SD)                                      | 1.40 (0.81)  | 1.46 (0.86)   | 1.43 (0.84)   |
| Median (IQR)                                   | 1.20 (0.75)  | 1.24 (0.86)   | 1.22 (0.82)   |
| <1.0                                           | 3574 (32.7%) | 4723 (32.0%)  | 8297 (32.3%)  |
| ≥1.0 <1.7                                      | 4802 (43.9%) | 5999 (40.7%)  | 10801 (42.1%) |
| ≥1.7                                           | 2556 (23.4%) | 4019 (27.3%)  | 6575 (25.6%)  |
| <b>Renal</b>                                   |              |               |               |
| eGFR (ml/min/1.73m <sup>2</sup> ) <sup>b</sup> |              |               |               |
| <60                                            | 1022 (9.3%)  | 2501 (17.0%)  | 3523 (13.7%)  |
| ≥60                                            | 9910 (90.7%) | 12240 (83.0%) | 22150 (86.3%) |
| Urine ACR (mg/mmol) <sup>c</sup>               |              |               |               |
| <3.4                                           | 9063 (82.9%) | 13108 (88.9%) | 22171 (86.4%) |
| ≥3.4 <34                                       | 1564 (14.3%) | 1423 (9.7%)   | 2987 (11.6%)  |
| ≥34                                            | 305 (2.8%)   | 210 (1.4%)    | 515 (2.0%)    |

<sup>a</sup> 97% of participants had all baseline lipid measurements available.

<sup>b</sup> Estimated glomerular filtration rate (eGFR) calculated by CKD-EPI formula (see methods)

<sup>c</sup> Albumin:creatinine ratio (ACR)

For categorical analyses, participants with missing values were assigned to the median value group

## Supplementary Table 2: Baseline lipids and other biochemical characteristics of randomized participants

|                                     | China        | Europe       | All           |
|-------------------------------------|--------------|--------------|---------------|
| <b>HbA1c (mmol/mol)</b>             |              |              |               |
| Participants with diabetes mellitus |              |              |               |
| <53                                 | 3320 (72.0%) | 2532 (68.7%) | 5852 (70.5%)  |
| ≥53                                 | 1291 (28.0%) | 1156 (31.3%) | 2447 (29.5%)  |
| All participants                    |              |              |               |
| <37                                 | 6060 (55.4%) | 7419 (50.3%) | 13479 (52.5%) |
| ≥37 <48                             | 2975 (27.2%) | 5539 (37.6%) | 8514 (33.2%)  |
| ≥48                                 | 1897 (17.4%) | 1783 (12.1%) | 3680 (14.3%)  |

<sup>a</sup> 97% of participants had all baseline lipid measurements available.

<sup>b</sup> Estimated glomerular filtration rate (eGFR) calculated by CKD-EPI formula (see methods)

<sup>c</sup> Albumin:creatinine ratio (ACR)

For categorical analyses, participants with missing values were assigned to the median value group

**Supplementary Table 3: Reasons for stopping randomized treatment by region**

|                                | ERN/LRPT     | Placebo      | Excess <sup>a</sup> (SE) |
|--------------------------------|--------------|--------------|--------------------------|
| <b>Number randomized</b>       |              |              |                          |
| China                          | 5464         | 5468         |                          |
| Europe                         | 7374         | 7367         |                          |
| <b>Medical reasons</b>         |              |              |                          |
| Any skin reason                |              |              |                          |
| China                          | 221 (4.0%)   | 57 (1.0%)    | 3.0% (0.3%)              |
| Europe                         | 476 (6.5%)   | 103 (1.4%)   | 5.1% (0.3%)              |
| Any gastrointestinal reason    |              |              |                          |
| China                          | 189 (3.5%)   | 91 (1.7%)    | 1.8% (0.3%)              |
| Europe                         | 306 (4.1%)   | 128 (1.7%)   | 2.4% (0.3%)              |
| Any hepatobiliary reason       |              |              |                          |
| China                          | 35 (0.6%)    | 24 (0.4%)    | 0.2% (0.1%)              |
| Europe                         | 17 (0.2%)    | 19 (0.3%)    | -0.0% (0.1%)             |
| Any musculoskeletal reason     |              |              |                          |
| China                          | 101 (1.8%)   | 29 (0.5%)    | 1.3% (0.2%)              |
| Europe                         | 124 (1.7%)   | 99 (1.3%)    | 0.3% (0.2%)              |
| Any diabetes-related reason    |              |              |                          |
| China                          | 63 (1.2%)    | 17 (0.3%)    | 0.8% (0.2%)              |
| Europe                         | 56 (0.8%)    | 33 (0.4%)    | 0.3% (0.1%)              |
| Any other medical reason       |              |              |                          |
| China                          | 167 (3.1%)   | 133 (2.4%)   | 0.6% (0.3%)              |
| Europe                         | 353 (4.8%)   | 288 (3.9%)   | 0.9% (0.3%)              |
| Any medical reason             |              |              |                          |
| China                          | 775 (14.2%)  | 350 (6.4%)   | 7.8% (0.6%)              |
| Europe                         | 1332 (18.1%) | 670 (9.1%)   | 9.0% (0.6%)              |
| <b>Non-medical reasons</b>     |              |              |                          |
| China                          | 431 (7.9%)   | 326 (6.0%)   | 1.9% (0.5%)              |
| Europe                         | 718 (9.7%)   | 790 (10.7%)  | -1.0% (0.5%)             |
| <b>Any reason for stopping</b> |              |              |                          |
| China                          | 1206 (22.1%) | 676 (12.4%)  | 9.7% (0.7%)              |
| Europe                         | 2050 (27.8%) | 1460 (19.8%) | 8.0% (0.7%)              |

<sup>a</sup> Excess is defined as the absolute percentage of patients who had the event in the ERN/LRPT group minus the percentage who had the event in the placebo group

**Supplementary Table 4: Liver and muscle-related events during follow-up in China**

|                                                        | ERN/LRPT      | Placebo      |
|--------------------------------------------------------|---------------|--------------|
| <b>Number randomized</b>                               | 5464          | 5468         |
| <b>Person years follow-up</b>                          | 21063         | 21203        |
| <b>Abnormal alanine transaminase (ALT)</b>             |               |              |
| Results collected at routine visits                    |               |              |
| >3 ≤5x ULN                                             | 79 (0.38%/y)  | 24 (0.11%/y) |
| >5 ≤10x ULN                                            | 15 (0.07%/y)  | 5 (0.02%/y)  |
| >10x ULN                                               | 2 (<0.01%/y)  | 4 (0.02%/y)  |
| Any >3 x ULN                                           | 96 (0.46%/y)  | 33 (0.16%/y) |
| Any >3 x ULN without muscle damage <sup>a</sup>        | 80 (0.38%/y)  | 32 (0.15%/y) |
| >3x ULN + bilirubin ≥2x ULN                            | 1 (<0.01%/y)  | 1 (<0.01%/y) |
| All results <sup>b</sup>                               |               |              |
| >3 ≤5x ULN                                             | 139 (0.66%/y) | 45 (0.21%/y) |
| >5 ≤10x ULN                                            | 65 (0.31%/y)  | 23 (0.11%/y) |
| >10x ULN                                               | 31 (0.15%/y)  | 16 (0.08%/y) |
| Any >3 x ULN                                           | 235 (1.12%/y) | 84 (0.40%/y) |
| Any >3 x ULN without muscle damage <sup>a</sup>        | 158 (0.75%/y) | 72 (0.34%/y) |
| Consecutive >3x ULN                                    | 71 (0.34%/y)  | 22 (0.10%/y) |
| Consecutive >3x ULN without muscle damage <sup>a</sup> | 31 (0.15%/y)  | 18 (0.08%/y) |
| >3x ULN + bilirubin ≥2x ULN                            | 8 (0.04%/y)   | 12 (0.06%/y) |
| <b>Myopathy</b>                                        |               |              |
| Definite myopathy                                      |               |              |
| Rhabdomyolysis                                         | 5 (0.02%/y)   | 1 (<0.01%/y) |
| Any definite myopathy                                  | 68 (0.32%/y)  | 13 (0.06%/y) |
| Incipient myopathy <sup>c</sup>                        |               |              |
| Symptomatic                                            | 18 (0.09%/y)  | 8 (0.04%/y)  |
| Asymptomatic                                           | 54 (0.26%/y)  | 7 (0.03%/y)  |
| Any incipient myopathy                                 | 71 (0.34%/y)  | 14 (0.07%/y) |
| Any myopathy                                           | 138 (0.66%/y) | 27 (0.13%/y) |

<sup>a</sup> Muscle damage defined as simultaneous creatine kinase >5x baseline and >3x ULN (within 7 days) of the ALT abnormality or diagnosis of myopathy (within 28 days)

<sup>b</sup> Includes results collected at routine and recall visits as well as external reports

<sup>c</sup> Incipient myopathy with no definite myopathy within 28 days

**Supplementary Table 5: Liver and muscle-related events during follow-up in Europe**

|                                                        | ERN/LRPT     | Placebo      |
|--------------------------------------------------------|--------------|--------------|
| <b>Number randomized</b>                               | 7374         | 7367         |
| <b>Person years follow-up</b>                          | 25176        | 25156        |
| <b>Abnormal alanine transaminase (ALT)</b>             |              |              |
| Results collected at routine visits                    |              |              |
| >3 ≤5x ULN                                             | 32 (0.13%/y) | 23 (0.09%/y) |
| >5 ≤10x ULN                                            | 8 (0.03%/y)  | 10 (0.04%/y) |
| >10x ULN                                               | 4 (0.02%/y)  | 1 (<0.01%/y) |
| Any >3 x ULN                                           | 44 (0.17%/y) | 34 (0.14%/y) |
| Any >3 x ULN without muscle damage <sup>a</sup>        | 44 (0.17%/y) | 33 (0.13%/y) |
| >3x ULN + bilirubin ≥2x ULN                            | 2 (<0.01%/y) | 4 (0.02%/y)  |
| All results <sup>b</sup>                               |              |              |
| >3 ≤5x ULN                                             | 51 (0.20%/y) | 31 (0.12%/y) |
| >5 ≤10x ULN                                            | 16 (0.06%/y) | 12 (0.05%/y) |
| >10x ULN                                               | 13 (0.05%/y) | 6 (0.02%/y)  |
| Any >3 x ULN                                           | 80 (0.32%/y) | 49 (0.19%/y) |
| Any >3 x ULN without muscle damage <sup>a</sup>        | 76 (0.30%/y) | 47 (0.19%/y) |
| Consecutive >3x ULN                                    | 17 (0.07%/y) | 12 (0.05%/y) |
| Consecutive >3x ULN without muscle damage <sup>a</sup> | 17 (0.07%/y) | 12 (0.05%/y) |
| >3x ULN + bilirubin ≥2x ULN                            | 6 (0.02%/y)  | 6 (0.02%/y)  |
| <b>Myopathy</b>                                        |              |              |
| Definite myopathy                                      |              |              |
| Rhabdomyolysis                                         | 2 (<0.01%/y) | 4 (0.02%/y)  |
| Any definite myopathy                                  | 7 (0.03%/y)  | 4 (0.02%/y)  |
| Incipient myopathy <sup>c</sup>                        |              |              |
| Symptomatic                                            | 5 (0.02%/y)  | 4 (0.02%/y)  |
| Asymptomatic                                           | 5 (0.02%/y)  | 3 (0.01%/y)  |
| Any incipient myopathy                                 | 10 (0.04%/y) | 7 (0.03%/y)  |
| Any myopathy                                           | 17 (0.07%/y) | 11 (0.04%/y) |

<sup>a</sup> Muscle damage defined as simultaneous creatine kinase >5x baseline and >3x ULN (within 7 days) of the ALT abnormality or diagnosis of myopathy (within 28 days)

<sup>b</sup> Includes results collected at routine and recall visits as well as external reports

<sup>c</sup> Incipient myopathy with no definite myopathy within 28 days
